# Supplementary material for: Novel WISP3 mutations causing progressive pseudorheumatoid dysplasia in two Chinese families
Source: PubMed Central journal article supplement — Hum Genome Var. 2016 Dec 8;3:16041–. doi: 10.1038/hgv.2016.41 (PMC5143363; doi:10.1038/hgv.2016.41), 2016-12-08
Supplement: hgv201641-s1.pdf [file hgv201641-s1.pdf]

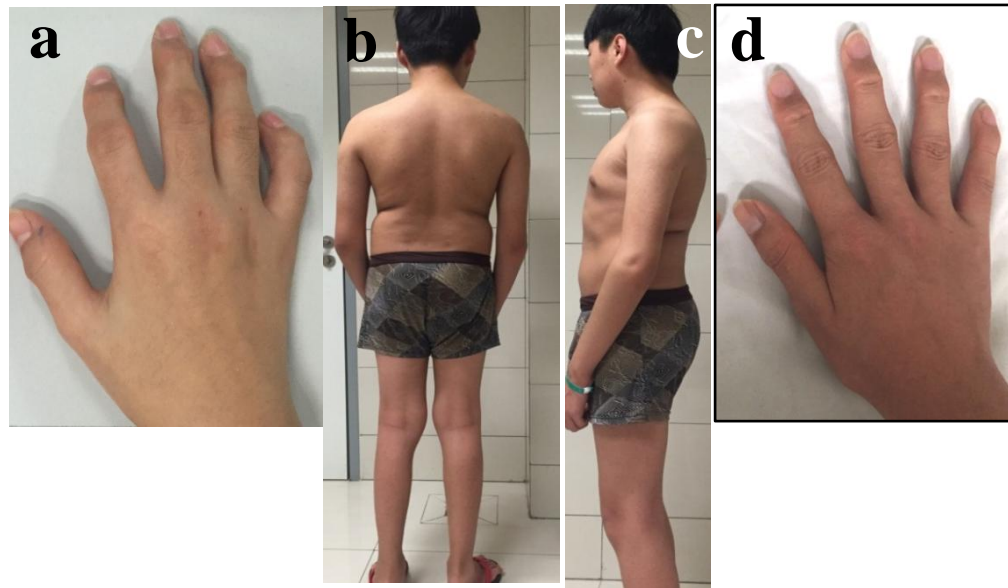

**Supplementary Fig. 1 clinical features of the patients with Progressive pseudorheumatoid chondrodysplasia**  
a) Hand of Patient 1 at age 27. The interphalangeal joints were swollen. b)-d) Patient 2 at age 17. Typical posture of PPD patient. Multiple joint contracture, short trunk, thoracic kyphosis, and swollen interphalangeal joints are noted.
