# Supplementary material for: Novel WISP3 mutations causing progressive pseudorheumatoid dysplasia in two Chinese families
Source: PubMed Central journal article supplement — Hum Genome Var. 2016 Dec 8;3:16041–. doi: 10.1038/hgv.2016.41 (PMC5143363; doi:10.1038/hgv.2016.41), 2016-12-08

Supplementary Fig.2 The screenshots of coverage at positions c.396T>G and c.721T>G in the Patient1.

a) c.396T>G in the Patient1. b) c.721T>G in the Patient1.

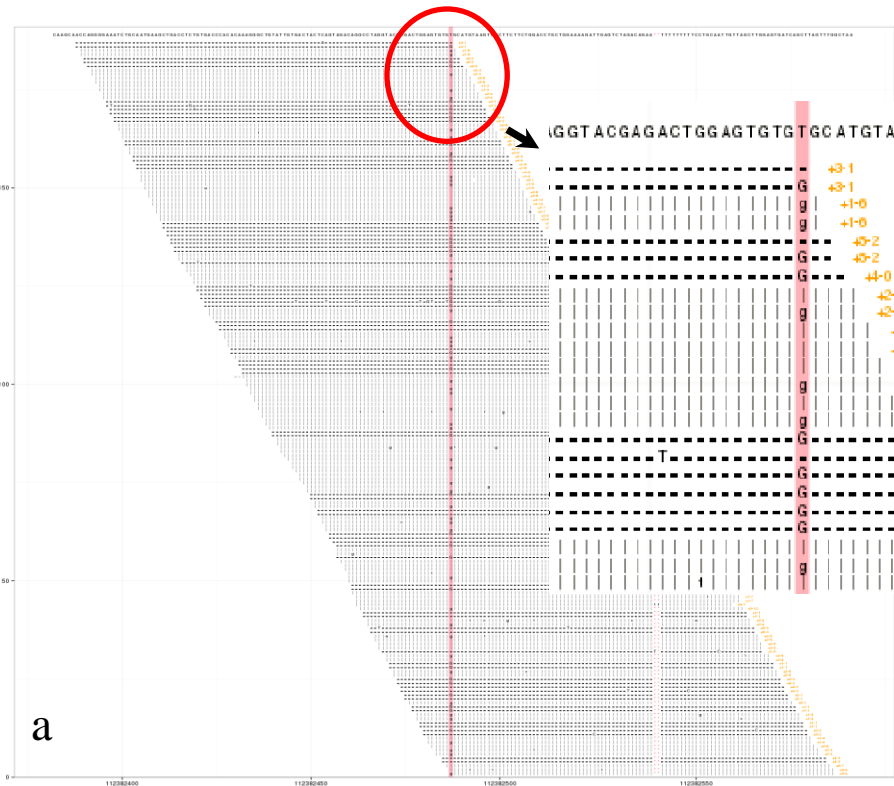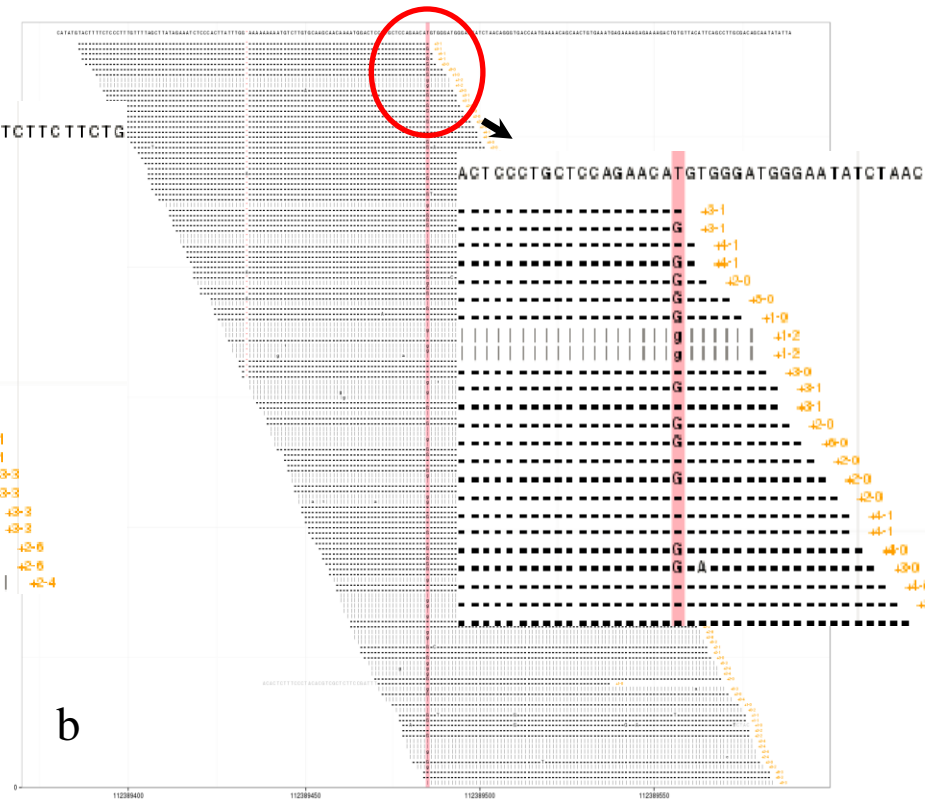

Supplement: hgv201641-s2.pdf [file hgv201641-s2.pdf]
